# Supplementary material for: S-Nitroso-Proteome Revealed in Stomatal Guard Cell Response to Flg22
Source: PubMed Central journal article supplement (PMC7084773; doi:10.3390/ijms21051688), 2020-03-01
Supplement: ijms-21-01688-s001.pdf [file ijms-21-01688-s001.pdf]

Supplemental Table 1. List of proteins significantly changed in levels in guard cells 15 min after exposure to flg22.

| Protein Accession | Protein Description                                                                         | Fold change | p-value |
|-------------------|---------------------------------------------------------------------------------------------|-------------|---------|
| AT5G26000         | Myrosinase 1                                                                                | 1.339       | 0.050   |
| AT5G07440         | Glutamate dehydrogenase 2                                                                   | 1.283       | 0.042   |
| AT3G13930         | Dihydrolipoyllysine-residue acetyltransferase component 2 of pyruvate dehydrogenase complex | 1.280       | 0.040   |
| AT4G35260         | Isocitrate dehydrogenase [NAD] regulatory subunit 1                                         | 1.251       | 0.038   |
| AT3G14310         | Pectinesterase/pectinesterase inhibitor 3                                                   | 1.243       | 0.038   |
| AT1G29660         | GDSL esterase/lipase                                                                        | 1.219       | 0.037   |
| AT1G53240         | Malate dehydrogenase 1                                                                      | 1.205       | 0.031   |
| AT5G54270         | Chlorophyll a-b binding protein 3                                                           | 0.742       | 0.004   |
| AT1G15820         | Light harvesting complex photosystem II subunit 6                                           | 0.724       | 0.002   |

Supplemental Table 2. List of proteins significantly changed in levels in guard cells 30 min after exposure to flg22.

| Protein Accession | Protein Description                                         | Fold change | p-value |
|-------------------|-------------------------------------------------------------|-------------|---------|
| AT2G47000         | ABC transporter B family member 4                           | 1.913       | 0.007   |
| AT2G44350         | Citrate synthase 4                                          | 1.639       | 0.039   |
| AT5G16390         | Biotin carboxyl carrier protein of acetyl-CoA carboxylase 1 | 1.518       | 0.007   |
| AT1G63000         | Bifunctional dTDP-4-dehydrorhamnose 3                       | 1.518       | 0.0173  |
| AT1G65930         | Cytosolic isocitrate dehydrogenase                          | 1.467       | 0.039   |
| AT5G20890         | T-complex protein 1 subunit beta                            | 1.457       | 0.002   |
| AT3G09200         | 60S acidic ribosomal protein P0-2                           | 1.430       | 0.001   |
| AT5G14780         | Formate dehydrogenase                                       | 1.411       | 0.019   |
| AT1G72370         | 40S ribosomal protein Sa-1                                  | 1.386       | 0.028   |
| AT1G13440         | Glyceraldehyde-3-phosphate dehydrogenase GAPC2              | 1.385       | 0.016   |
| AT3G25140         | Galacturonosyltransferase 8                                 | 1.374       | 0.038   |
| AT1G53240         | Malate dehydrogenase 1                                      | 1.358       | 0.024   |
| AT5G15490         | UDP-glucose 6-dehydrogenase 3                               | 1.351       | 0.006   |
| AT1G01090         | Pyruvate dehydrogenase E1 component subunit alpha-3         | 1.299       | 0.005   |

Supplemental Table 2. Continued

| Protein Accession | Protein Description                                | Fold change | p-value |
|-------------------|----------------------------------------------------|-------------|---------|
| AT5G47200         | Ras-related protein RABD2b                         | 1.297       | 0.004   |
| AT2G33150         | 3-ketoacyl-CoA thiolase 2                          | 1.284       | 0.025   |
| AT5G08590         | Serine/threonine-protein kinase SRK2G              | 0.743       | 0.018   |
| AT3G09810         | Isocitrate dehydrogenase [NAD] catalytic subunit 6 | 0.732       | 0.003   |
| AT4G26530         | Fructose-bisphosphate aldolase 5                   | 0.674       | 0.004   |
| AT3G49120         | Peroxidase 34                                      | 0.668       | 0.006   |
| AT3G23400         | Plastid-lipid-associated protein 6                 | 0.654       | 0.016   |
| AT1G15820         | Light harvesting complex photosystem II subunit 6  | 0.642       | 0.011   |
| AT3G15360         | Thioredoxin M4                                     | 0.612       | 0.050   |
| ATCG00720         | Cytochrome b6                                      | 0.548       | 0.026   |
| AT1G52400         | Beta-D-glucopyranosyl abscisate beta-glucosidase   | 0.548       | 0.004   |
| AT5G18170         | Glutamate dehydrogenase 1                          | 0.538       | 0.002   |
| AT4G00370         | Ascorbate transporter                              | 0.534       | 0.014   |
| ATCG00680         | Photosystem II CP47 reaction center protein        | 0.514       | 0.001   |

Supplemental Table 3. List of proteins significantly changed in levels in guard cells 60 min after exposure to flg22.

| Protein Accession | Protein Description                             | Fold change | p-value |
|-------------------|-------------------------------------------------|-------------|---------|
| AT4G03280         | Cytochrome b6-f complex iron-sulfur subunit     | 1.436       | 0.033   |
| AT5G26000         | Myrosinase 1                                    | 1.422       | 0.005   |
| AT5G52320         | Cytochrome P450                                 | 1.414       | 0.018   |
| AT4G25900         | Galactose mutarotase-like superfamily protein   | 1.397       | 0.006   |
| AT2G22480         | ATP-dependent 6-phosphofructokinase 5           | 1.374       | 0.005   |
| AT1G12900         | Glyceraldehyde-3-phosphate dehydrogenase GAPA2  | 1.365       | 0.005   |
| AT5G03660         | Family of unknown function (DUF662)             | 1.347       | 0.022   |
| AT1G53240         | Malate dehydrogenase 1                          | 1.331       | 0.011   |
| AT2G45640         | Histone deacetylase complex subunit SAP18       | 1.319       | 0.009   |
| AT2G40610         | Expansin-A8                                     | 1.312       | 0.008   |
| AT1G20450         | Dehydrin ERD10                                  | 1.290       | 0.002   |
| AT2G20760         | Clathrin light chain 1                          | 1.278       | 0.005   |
| AT5G49360         | Beta-D-xylosidase 1                             | 1.269       | 0.019   |
| AT1G43160         | Ethylene-responsive transcription factor RAP2-6 | 1.267       | 0.023   |

Supplemental Table 3. Continued

| Protein Accession | Protein Description                                         | Fold change | p-value |
|-------------------|-------------------------------------------------------------|-------------|---------|
| AT2G26040         | Abscisic acid receptor PYL2                                 | 1.267       | 0.021   |
| AT1G12270         | Hsp70-Hsp90 organizing protein 1                            | 1.263       | 0.005   |
| AT5G15090         | Mitochondrial outer membrane protein porin 3                | 1.260       | 0.010   |
| AT4G32410         | Cellulose synthase A catalytic subunit 1                    | 1.257       | 0.013   |
| AT3G45780         | Phototropin-1                                               | 1.253       | 0.003   |
| AT1G78830         | EP1-like glycoprotein 2                                     | 1.245       | 0.029   |
| AT5G48540         | Cysteine-rich repeat secretory protein 55                   | 1.242       | 0.041   |
| AT5G16390         | Biotin carboxyl carrier protein of acetyl-CoA carboxylase 1 | 1.241       | 0.009   |
| AT2G41100         | Calmodulin-like protein 12                                  | 1.240       | 0.004   |
| AT1G07890         | L-ascorbate peroxidase 1                                    | 1.231       | 0.048   |
| AT4G39640         | Gamma-glutamyltranspeptidase 1                              | 1.226       | 0.001   |
| AT4G22220         | Iron-sulfur cluster assembly protein 1                      | 1.216       | 0.002   |
| AT2G33150         | 3-ketoacyl-CoA thiolase 2                                   | 1.214       | 0.003   |
| AT3G20410         | Calcium-dependent protein kinase 9                          | 1.207       | 0.044   |

Supplemental Table 3. Continued

| Protein Accession | Protein Description                                               | Fold change | p-value |
|-------------------|-------------------------------------------------------------------|-------------|---------|
| AT5G07440         | Glutamate dehydrogenase 2                                         | 1.204       | 0.001   |
| AT3G27380         | Succinate dehydrogenase                                           | 1.203       | 0.001   |
| AT5G49760         | Leucine-rich repeat protein kinase family protein                 | 1.202       | 0.030   |
| AT2G21330         | Fructose-bisphosphate aldolase 1                                  | 0.766       | 0.042   |
| AT1G08450         | Calreticulin-3                                                    | 0.761       | 0.032   |
| AT1G15820         | Light harvesting complex photosystem II subunit 6                 | 0.747       | 0.044   |
| AT1G02870         | Unknown function                                                  | 0.734       | 0.030   |
| AT2G16950         | Isoform 2 of Transportin-1                                        | 0.718       | 0.001   |
| AT2G29560         | Cytosolic enolase 3                                               | 0.711       | 0.020   |
| AT3G06350         | Bifunctional 3-dehydroquinate dehydratase/shikimate dehydrogenase | 0.707       | 0.014   |
| AT1G19670         | Chlorophyllase-1                                                  | 0.678       | 0.035   |
| AT1G52400         | Beta-D-glucopyranosyl abscisate beta-glucosidase                  | 0.490       | 0.030   |
| AT3G57260         | 3-ketoacyl-CoA thiolase 2                                         | 0.373       | 0.028   |
